# Supplementary material for: Definition of Building Archetypes Based on the Swiss Energy Performance Certificates Database
Source: MDPI journal article supplement (doi:10.3390/buildings13010040), 2022-12-24
Supplement: s1 [file s1]

Single-Family House  
52.5%  
corresponding to 676,427 m<sup>2</sup> ERA

Multi-Family House  
47.5%  
corresponding to 1,849,008 m<sup>2</sup> ERA



Figure S2: Archetype 2\_1919–1945

Single-Family House  
62.3%  
corresponding to 528,062 m<sup>2</sup> ERA

1919–1945  
4124 Samples  
8.9% of dataset

Multi-Family House  
37.7%  
corresponding to 1,088,542 m<sup>2</sup> ERA

General infos:

ERA [m<sup>2</sup>]: 154 - 195 - 248  
Envelope factor: 1.71 - 1.93 - 2.16  
Number of floors: 2 - 2 - 3  
Floors height [m]: 2.4 - 2.4 - 2.5

Construction type:

Medium: 47%  
Heavy: 45%  
Light: 8%

- ① Roof:  
U-value [W/m<sup>2</sup>K]:  
0.26 - 0.44 - 0.8  
Surface [m<sup>2</sup>]:  
75 - 96 - 123
- ② Wall:  
U-value [W/m<sup>2</sup>K]:  
0.5 - 0.9 - 1.1  
Surface [m<sup>2</sup>]:  
144 - 184 - 225
- ③ Window:  
U-value [W/m<sup>2</sup>K]:  
1.4 - 1.8 - 2.5  
Surface to ERA ratio:  
0.13 - 0.16 - 0.16
- ④ Floor:  
U-value [W/m<sup>2</sup>K]:  
0.55 - 0.9 - 1.3  
Surface [m<sup>2</sup>]:  
64 - 82 - 104

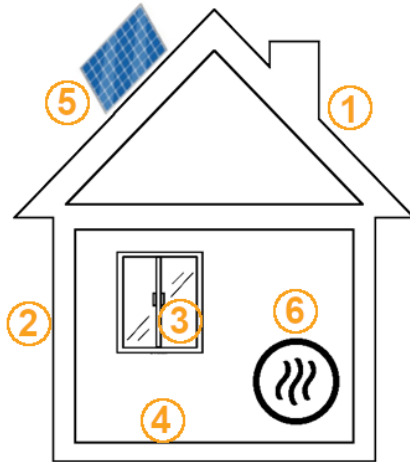

- ⑤ Photovoltaic:  
Occurrence: 4.7%  
Power [kW]:  
3.2 - 6.0 - 11.2
- ⑥ Primary energy source:  
Fuel oil: 43%  
Gas: 26%  
Heat pump: 12%  
Wood: 10%  
Electricity: 7%  
District heating: 2%

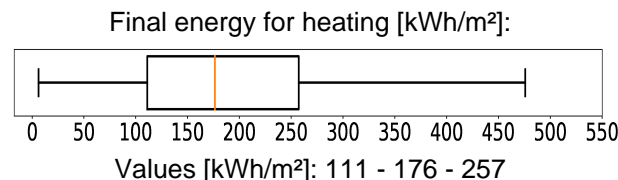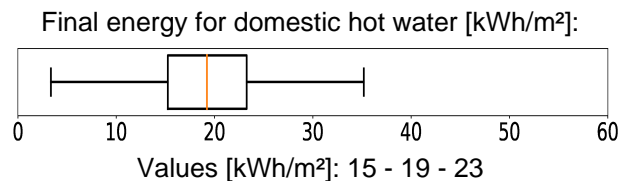

Global energy efficiency

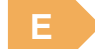

Envelope efficiency

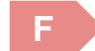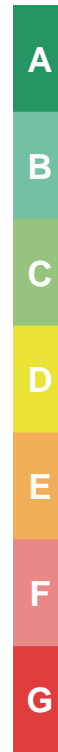

Envelope efficiency

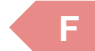

Global energy efficiency

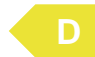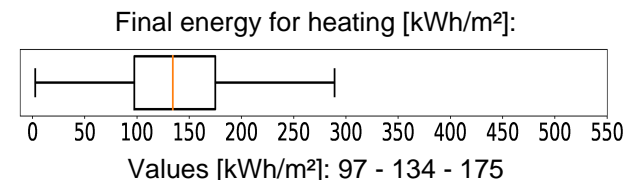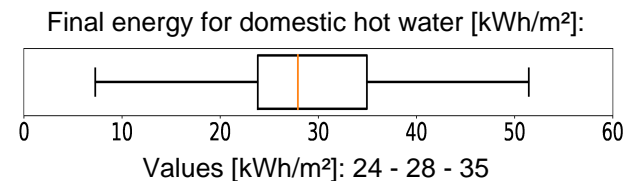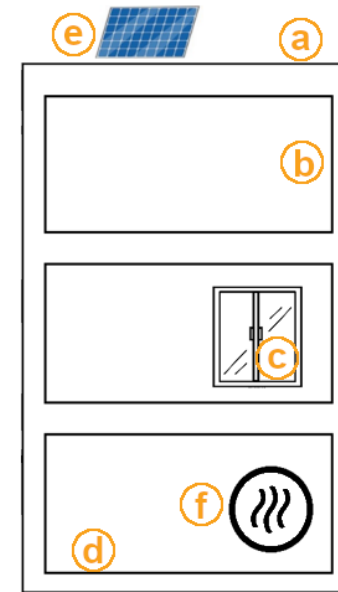

General infos:

ERA [m<sup>2</sup>]: 352 - 546 - 869  
Envelope factor: 1.12 - 1.38 - 1.66  
Number of floors: 3 - 3 - 4  
Floors height [m]: 2.4 - 2.5 - 2.7

Construction type:

Heavy: 61%  
Medium: 37%  
Light: 2%

- a Roof:  
U-value [W/m<sup>2</sup>K]:  
0.3 - 0.57 - 1.0  
Surface [m<sup>2</sup>]:  
132 - 184 - 254

- b Wall:  
U-value [W/m<sup>2</sup>K]:  
0.68 - 0.98 - 1.2  
Surface [m<sup>2</sup>]:  
269 - 358 - 511

- c Window:  
U-value [W/m<sup>2</sup>K]:  
1.5 - 1.8 - 2.5  
Surface to ERA ratio:  
0.13 - 0.15 - 0.16

- d Floor:  
U-value [W/m<sup>2</sup>K]:  
0.65 - 1.1 - 1.4  
Surface [m<sup>2</sup>]:  
110 - 159 - 217

- e Photovoltaic:  
Occurrence: 1.9%  
Power [kW]:  
8.6 - 10.5 - 24.7

- f Primary energy source:  
Fuel oil: 44%  
Gas: 38%  
Heat pump: 6%  
District heating: 6%  
Wood: 3%  
Electricity: 3%

Figure S3: Archetype 3\_1946–1960

Single-Family House  
60.8%  
corresponding to 633,299 m<sup>2</sup> ERA

1946–1960  
5523 Samples  
11.9% of dataset

Multi-Family House  
39.2%  
corresponding to 1,933,982 m<sup>2</sup> ERA

General infos:  
ERA [m<sup>2</sup>]: 142 - 180 - 227  
Envelope factor: 1.8 - 2.02 - 2.27  
Number of floors: 2 - 2 - 2  
Floors height [m]: 2.4 - 2.4 - 2.4

Construction type:  
Medium: 47%  
Heavy: 44%  
Light: 9%

① Roof:  
U-value [W/m<sup>2</sup>K]:  
0.25 - 0.44 - 0.8  
Surface [m<sup>2</sup>]:  
75 - 95 - 121

② Wall:  
U-value [W/m<sup>2</sup>K]:  
0.43 - 0.81 - 1.1  
Surface [m<sup>2</sup>]:  
133 - 168 - 205

③ Window:  
U-value [W/m<sup>2</sup>K]:  
1.3 - 1.6 - 2.4  
Surface to ERA ratio:  
0.14 - 0.16 - 0.17

④ Floor:  
U-value [W/m<sup>2</sup>K]:  
0.6 - 0.98 - 1.5  
Surface [m<sup>2</sup>]:  
68 - 86 - 110

⑤ Photovoltaic:  
Occurrence: 5.3%  
Power [kW]:  
5.5 - 8.0 - 10.0

⑥ Primary energy source:  
Fuel oil: 50%  
Heat pump: 18%  
Gas: 17%  
Wood: 8%  
Electricity: 6%  
District heating: 1%

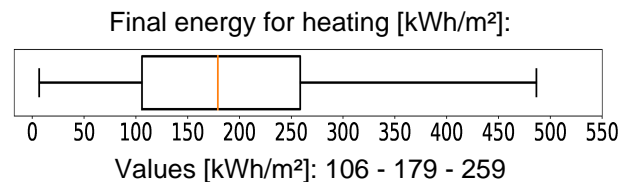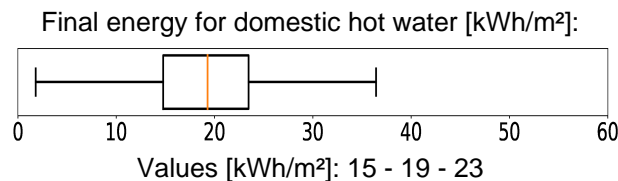

Global energy efficiency

E

Envelope efficiency

F

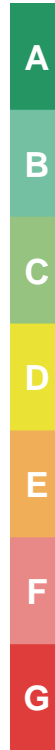

Envelope efficiency

F

Global energy efficiency

D

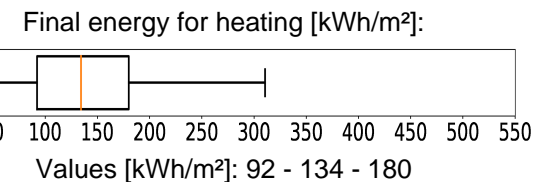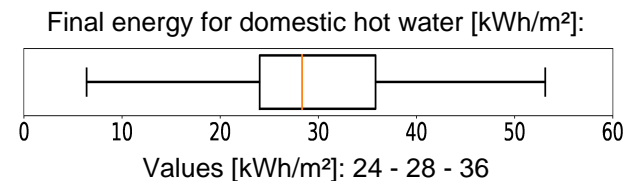

General infos:  
ERA [m<sup>2</sup>]: 475 - 681 - 1122  
Envelope factor: 1.1 - 1.29 - 1.55  
Number of floors: 3 - 3 - 4  
Floors height [m]: 2.4 - 2.4 - 2.5

Construction type:  
Heavy: 65%  
Medium: 34%  
Light: 1%

① Roof:  
U-value [W/m<sup>2</sup>K]:  
0.3 - 0.55 - 1.0  
Surface [m<sup>2</sup>]:  
167 - 225 - 326

② Wall:  
U-value [W/m<sup>2</sup>K]:  
0.4 - 0.9 - 1.1  
Surface [m<sup>2</sup>]:  
311 - 428 - 647

③ Window:  
U-value [W/m<sup>2</sup>K]:  
1.5 - 1.7 - 2.2  
Surface to ERA ratio:  
0.13 - 0.16 - 0.16

④ Floor:  
U-value [W/m<sup>2</sup>K]:  
0.62 - 1.2 - 1.5  
Surface [m<sup>2</sup>]:  
157 - 204 - 298

⑤ Photovoltaic:  
Occurrence: 2.4%  
Power [kW]:  
8.6 - 13.5 - 31.0

⑥ Primary energy source:  
Fuel oil: 54%  
Gas: 27%  
District heating: 11%  
Heat pump: 4%  
Electricity: 2%  
Wood: 2%

Figure S4: Archetype 4\_1961–1970

Single-Family House  
52.3%  
corresponding to 661,018 m<sup>2</sup> ERA

1961–1970  
6375 Samples  
13.7% of dataset

Multi-Family House  
47.7%  
corresponding to 3,766,041 m<sup>2</sup> ERA

General infos:

ERA [m<sup>2</sup>]: 146 - 190 - 244  
Envelope factor: 1.82 - 2.04 - 2.35  
Number of floors: 1 - 2 - 2  
Floors height [m]: 2.4 - 2.4 - 2.4

Construction type:

Heavy: 49%  
Medium: 45%  
Light: 6%

① Roof:  
U-value [W/m<sup>2</sup>K]:  
0.27 - 0.47 - 0.8  
Surface [m<sup>2</sup>]:  
82 - 109 - 141

② Wall:  
U-value [W/m<sup>2</sup>K]:  
0.45 - 0.7 - 1.0  
Surface [m<sup>2</sup>]:  
126 - 163 - 205

③ Window:  
U-value [W/m<sup>2</sup>K]:  
1.3 - 1.7 - 2.5  
Surface to ERA ratio:  
0.15 - 0.16 - 0.19

④ Floor:  
U-value [W/m<sup>2</sup>K]:  
0.63 - 1.0 - 1.5  
Surface [m<sup>2</sup>]:  
75 - 99 - 128

⑤ Photovoltaic:  
Occurrence: 4.0%  
Power [kW]:  
4.9 - 8.7 - 11.7

⑥ Primary energy source:  
Fuel oil: 61%  
Heat pump: 15%  
Gas: 10%  
Electricity: 7%  
Wood: 6%  
District heating: 1%

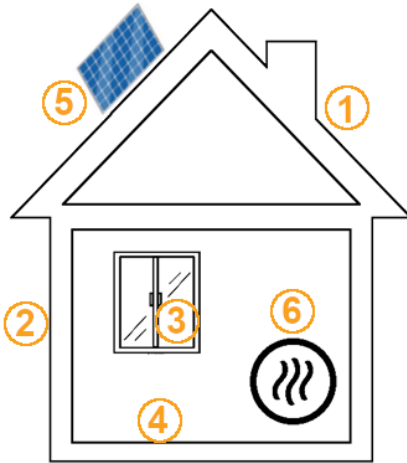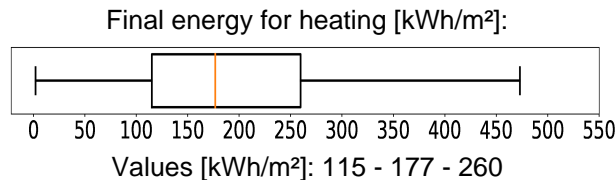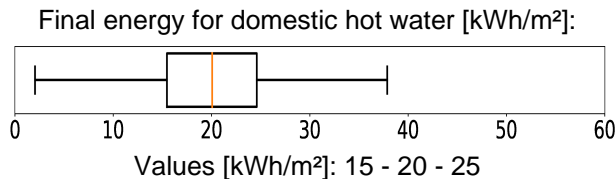

Global energy efficiency

E

Envelope efficiency

F

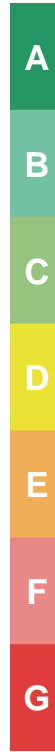

Envelope efficiency

F

Global energy efficiency

D

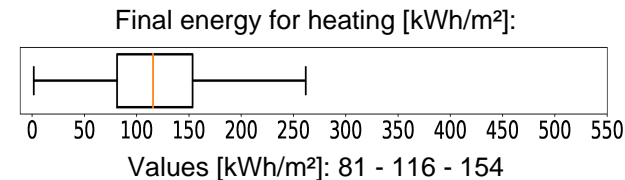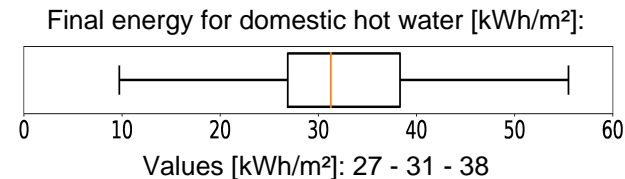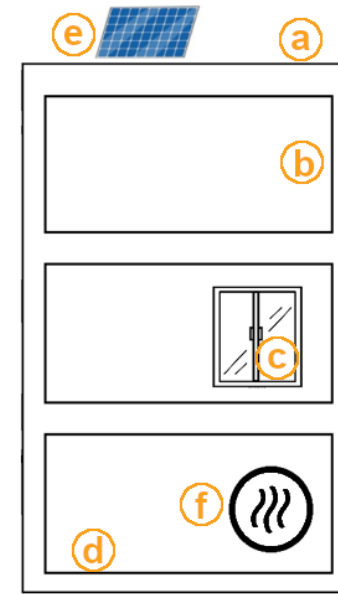

General infos:

ERA [m<sup>2</sup>]: 618 - 970 - 1581  
Envelope factor: 1.04 - 1.2 - 1.39  
Number of floors: 3 - 4 - 5  
Floors height [m]: 2.4 - 2.4 - 2.5

Construction type:

Heavy: 71%  
Medium: 28%  
Light: 1%

Roof:  
U-value [W/m<sup>2</sup>K]:  
0.29 - 0.48 - 0.83  
Surface [m<sup>2</sup>]:  
196 - 271 - 380

Wall:  
U-value [W/m<sup>2</sup>K]:  
0.35 - 0.67 - 1.1  
Surface [m<sup>2</sup>]:  
372 - 545 - 818

Window:  
U-value [W/m<sup>2</sup>K]:  
1.5 - 1.7 - 2.2  
Surface to ERA ratio:  
0.15 - 0.16 - 0.17

Floor:  
U-value [W/m<sup>2</sup>K]:  
0.7 - 1.2 - 1.5  
Surface [m<sup>2</sup>]:  
185 - 260 - 369

Photovoltaic:  
Occurrence: 1.9%  
Power [kW]:  
13.4 - 20.0 - 25.1

Primary energy source:  
Fuel oil: 59%  
Gas: 27%  
District heating: 9%  
Heat pump: 3%  
Wood: 1%  
Electricity: 1%

Figure S5: Archetype 5\_1971–1980

Single-Family House  
57.8%  
corresponding to 915,779 m<sup>2</sup> ERA

1971–1980  
7519 Samples  
16.1% of dataset

Multi-Family House  
42.2%  
corresponding to 4,623,873 m<sup>2</sup> ERA

General infos:

ERA [m<sup>2</sup>]: 161 - 200 - 250  
Envelope factor: 1.76 - 1.99 - 2.27  
Number of floors: 2 - 2 - 2  
Floors height [m]: 2.4 - 2.4 - 2.5

Construction type:

Medium: 48%  
Heavy: 47%  
Light: 5%

Roof:

U-value [W/m<sup>2</sup>K]:  
0.3 - 0.41 - 0.6  
Surface [m<sup>2</sup>]:  
86 - 115 - 147

Wall:

U-value [W/m<sup>2</sup>K]:  
0.4 - 0.56 - 0.8  
Surface [m<sup>2</sup>]:  
127 - 163 - 205

Window:

U-value [W/m<sup>2</sup>K]:  
1.3 - 1.7 - 2.5  
Surface to ERA ratio:  
0.15 - 0.16 - 0.19

Floor:

U-value [W/m<sup>2</sup>K]:  
0.6 - 0.88 - 1.3  
Surface [m<sup>2</sup>]:  
77 - 103 - 132

Photovoltaic:

Occurrence: 4.9%  
Power [kW]:  
5.4 - 7.6 - 11.7

Primary energy source:

Fuel oil: 51%  
Electricity: 20%  
Heat pump: 15%  
Gas: 7%  
Wood: 5%  
District heating: 2%

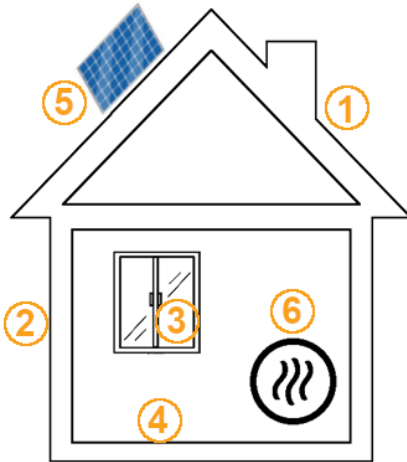

Final energy for heating [kWh/m<sup>2</sup>]:

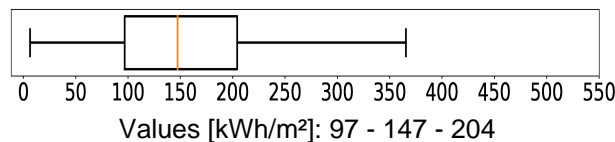

Final energy for domestic hot water [kWh/m<sup>2</sup>]:

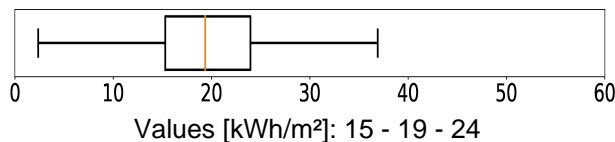

Global energy efficiency

Envelope efficiency

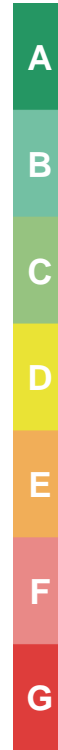

Envelope efficiency

Global energy efficiency

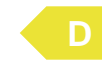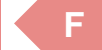

General infos:

ERA [m<sup>2</sup>]: 677 - 1073 - 1820  
Envelope factor: 1.03 - 1.2 - 1.38  
Number of floors: 3 - 4 - 5  
Floors height [m]: 2.4 - 2.4 - 2.5

Construction type:

Heavy: 72%  
Medium: 27%  
Light: 1%

Roof:

U-value [W/m<sup>2</sup>K]:  
0.29 - 0.49 - 0.7  
Surface [m<sup>2</sup>]:  
219 - 295 - 418

Wall:

U-value [W/m<sup>2</sup>K]:  
0.44 - 0.67 - 0.97  
Surface [m<sup>2</sup>]:  
382 - 584 - 884

Window:

U-value [W/m<sup>2</sup>K]:  
1.5 - 1.8 - 2.5  
Surface to ERA ratio:  
0.15 - 0.16 - 0.17

Floor:

U-value [W/m<sup>2</sup>K]:  
0.71 - 1.0 - 1.5  
Surface [m<sup>2</sup>]:  
203 - 278 - 397

Photovoltaic:

Occurrence: 1.1%  
Power [kW]:  
14.8 - 15.0 - 20.0

Primary energy source:

Fuel oil: 66%  
Gas: 20%  
District heating: 8%  
Electricity: 3%  
Heat pump: 2%  
Wood: 1%

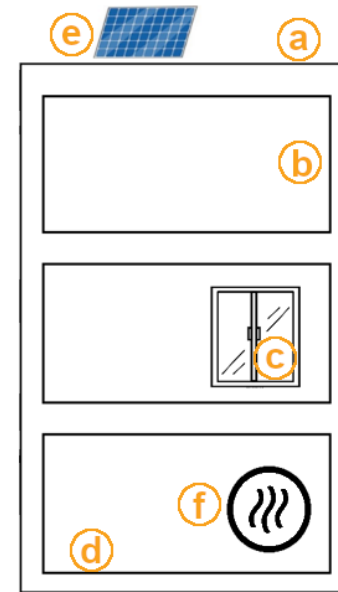

Final energy for heating [kWh/m<sup>2</sup>]:

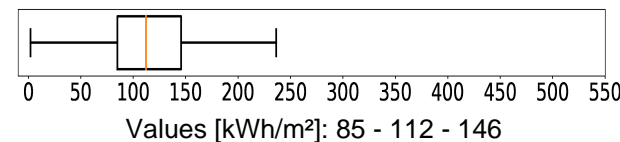

Final energy for domestic hot water [kWh/m<sup>2</sup>]:

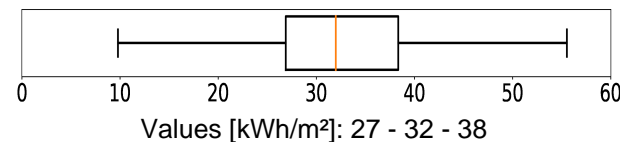

Figure S6: Archetype 6\_1981–1990

1981–1990  
6874 Samples  
14.8% of dataset

Single-Family House  
62.0%  
corresponding to 904,562 m<sup>2</sup> ERA

Multi-Family House  
38.0%  
corresponding to 3,219,269 m<sup>2</sup> ERA

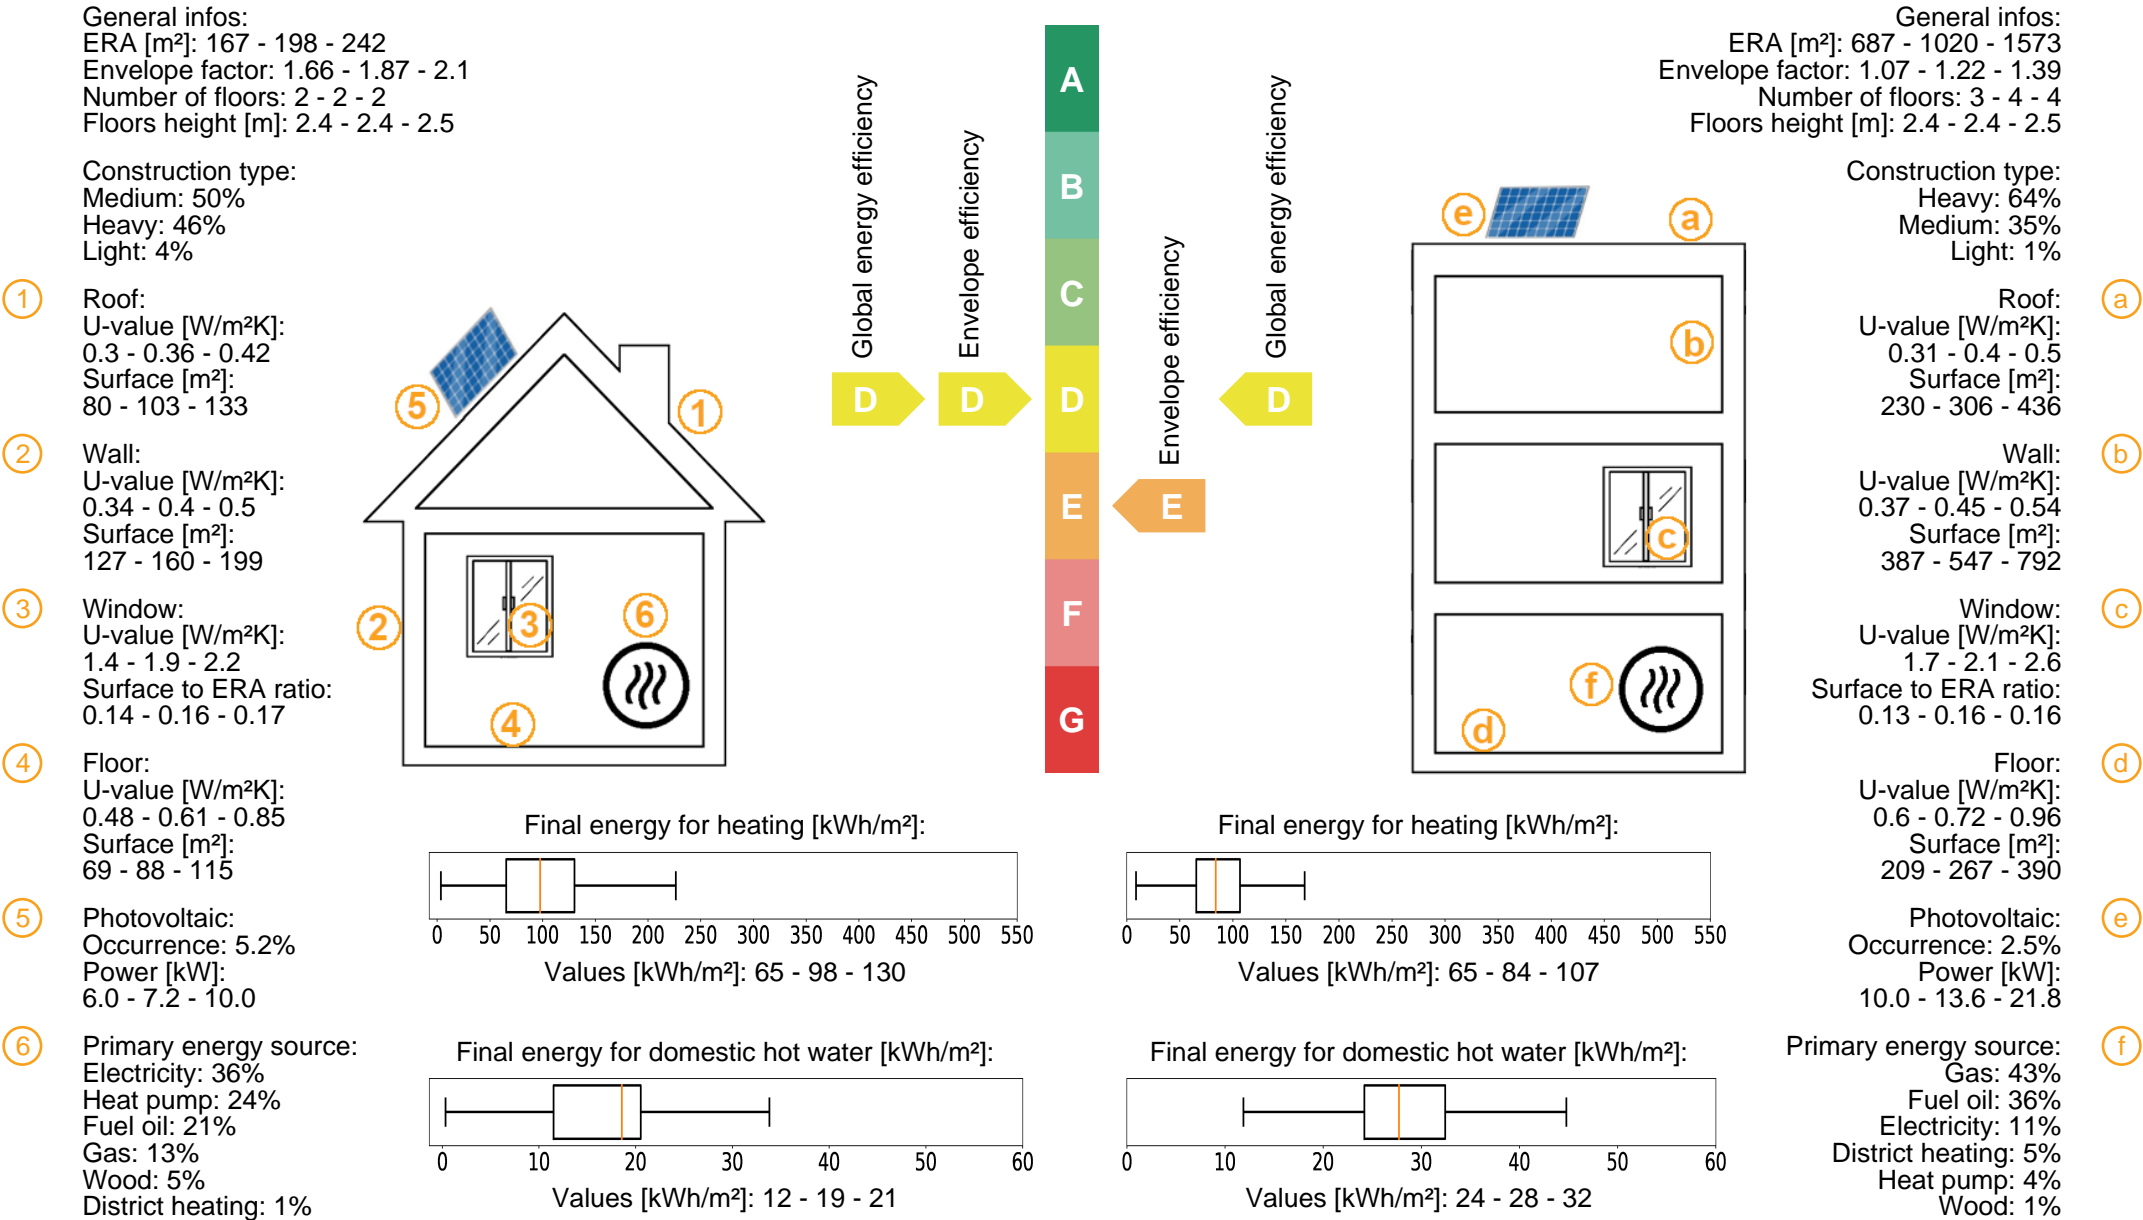



Figure S7: Archetype 7\_1991–2000

Single-Family House  
60.4%  
corresponding to 471,918 m<sup>2</sup> ERA

1991–2000  
3651 Samples  
7.8% of dataset

Multi-Family House  
39.6%  
corresponding to 1,775,431 m<sup>2</sup> ERA

General infos:  
ERA [m<sup>2</sup>]: 166 - 199 - 242  
Envelope factor: 1.61 - 1.82 - 2.05  
Number of floors: 2 - 2 - 3  
Floors height [m]: 2.4 - 2.4 - 2.5

Construction type:  
Heavy: 48%  
Medium: 46%  
Light: 6%

① Roof:  
U-value [W/m<sup>2</sup>K]:  
0.29 - 0.34 - 0.38  
Surface [m<sup>2</sup>]:  
76 - 96 - 125

② Wall:  
U-value [W/m<sup>2</sup>K]:  
0.3 - 0.35 - 0.4  
Surface [m<sup>2</sup>]:  
127 - 164 - 206

③ Window:  
U-value [W/m<sup>2</sup>K]:  
1.5 - 1.7 - 2.0  
Surface to ERA ratio:  
0.15 - 0.16 - 0.17

④ Floor:  
U-value [W/m<sup>2</sup>K]:  
0.43 - 0.55 - 0.7  
Surface [m<sup>2</sup>]:  
65 - 81 - 105

⑤ Photovoltaic:  
Occurrence: 6.4%  
Power [kW]:  
3.5 - 5.1 - 8.8

⑥ Primary energy source:  
Fuel oil: 35%  
Gas: 30%  
Heat pump: 22%  
Electricity: 8%  
Wood: 4%  
District heating: 1%

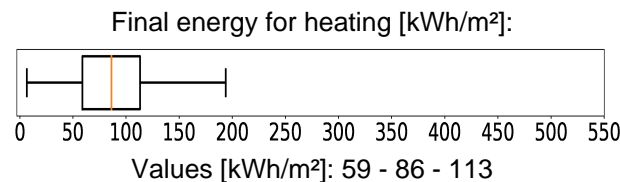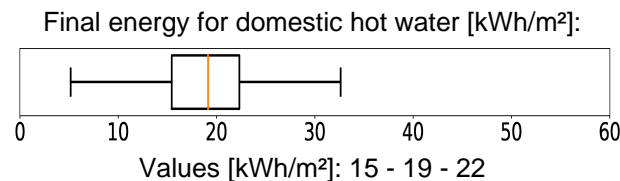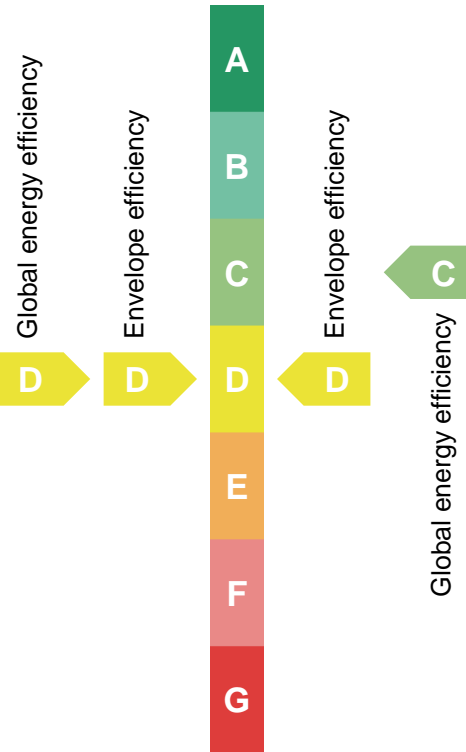

General infos:  
ERA [m<sup>2</sup>]: 720 - 1044 - 1502  
Envelope factor: 1.1 - 1.24 - 1.39  
Number of floors: 3 - 3 - 4  
Floors height [m]: 2.4 - 2.4 - 2.5

Construction type:  
Heavy: 66%  
Medium: 33%  
Light: 1%

① Roof:  
U-value [W/m<sup>2</sup>K]:  
0.3 - 0.35 - 0.4  
Surface [m<sup>2</sup>]:  
253 - 323 - 464

② Wall:  
U-value [W/m<sup>2</sup>K]:  
0.33 - 0.4 - 0.45  
Surface [m<sup>2</sup>]:  
402 - 546 - 765

③ Window:  
U-value [W/m<sup>2</sup>K]:  
1.6 - 2.0 - 2.1  
Surface to ERA ratio:  
0.14 - 0.16 - 0.17

④ Floor:  
U-value [W/m<sup>2</sup>K]:  
0.5 - 0.6 - 0.75  
Surface [m<sup>2</sup>]:  
214 - 276 - 390

⑤ Photovoltaic:  
Occurrence: 1.0%  
Power [kW]:  
6.0 - 10.5 - 10.5

⑥ Primary energy source:  
Gas: 50%  
Fuel oil: 37%  
District heating: 4%  
Heat pump: 4%  
Electricity: 3%  
Wood: 2%

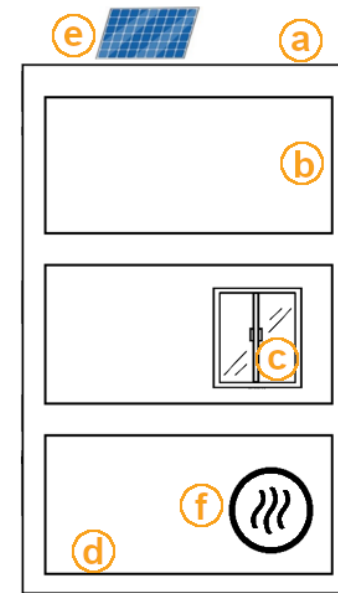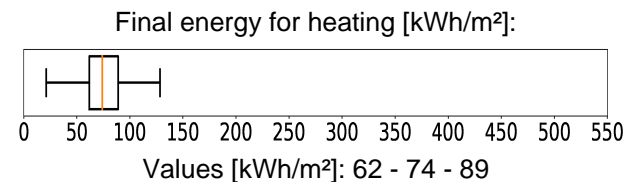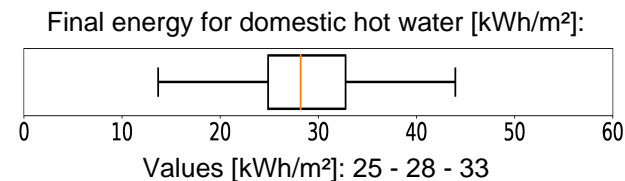

Figure S8: Archetype 8\_2001–2010

Single-Family House  
53.1%  
corresponding to 326,448 m<sup>2</sup> ERA

2001–2010  
2895 Samples  
6.2% of dataset

Multi-Family House  
46.9%  
corresponding to 1,813,825 m<sup>2</sup> ERA

General infos:

ERA [m<sup>2</sup>]: 172 - 201 - 245  
Envelope factor: 1.66 - 1.88 - 2.1  
Number of floors: 2 - 2 - 3  
Floors height [m]: 2.4 - 2.4 - 2.5

Construction type:

Heavy: 50%  
Medium: 41%  
Light: 9%

① Roof:  
U-value [W/m<sup>2</sup>K]:  
0.22 - 0.26 - 0.3  
Surface [m<sup>2</sup>]:  
79 - 97 - 122

② Wall:  
U-value [W/m<sup>2</sup>K]:  
0.25 - 0.3 - 0.35  
Surface [m<sup>2</sup>]:  
141 - 178 - 215

③ Window:  
U-value [W/m<sup>2</sup>K]:  
1.4 - 1.5 - 1.5  
Surface to ERA ratio:  
0.15 - 0.16 - 0.18

④ Floor:  
U-value [W/m<sup>2</sup>K]:  
0.3 - 0.38 - 0.5  
Surface [m<sup>2</sup>]:  
68 - 84 - 106

⑤ Photovoltaic:  
Occurrence: 5.3%  
Power [kW]:  
5.7 - 7.0 - 10.4

⑥ Primary energy source:  
Gas: 36%  
Heat pump: 32%  
Fuel oil: 25%  
Wood: 4%  
Electricity: 2%  
District heating: 1%

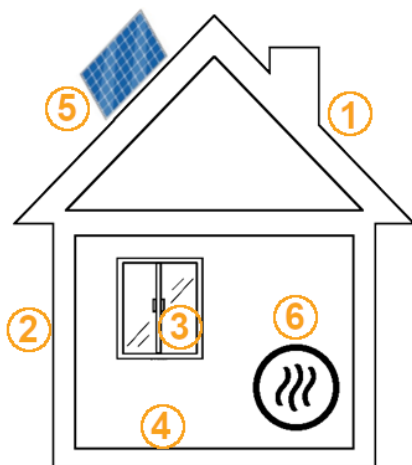

Final energy for heating [kWh/m<sup>2</sup>]:

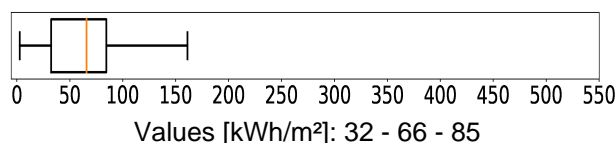

Final energy for domestic hot water [kWh/m<sup>2</sup>]:

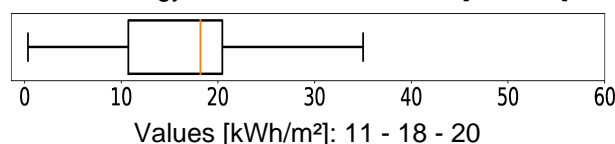

Global energy efficiency

Envelope efficiency

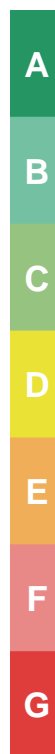

Envelope efficiency

Global energy efficiency

Final energy for heating [kWh/m<sup>2</sup>]:

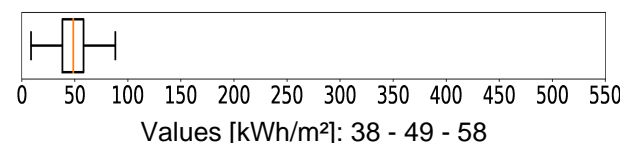

Final energy for domestic hot water [kWh/m<sup>2</sup>]:

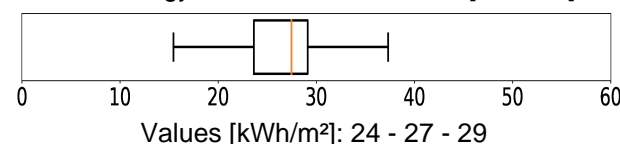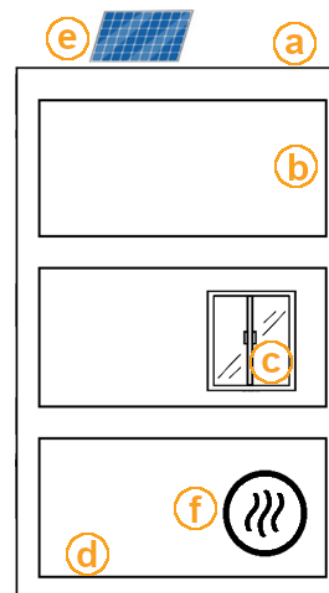

General infos:

ERA [m<sup>2</sup>]: 776 - 1110 - 1677  
Envelope factor: 1.06 - 1.2 - 1.38  
Number of floors: 3 - 4 - 4  
Floors height [m]: 2.4 - 2.4 - 2.5

Construction type:

Heavy: 72%  
Medium: 27%  
Light: 1%

Roof:  
U-value [W/m<sup>2</sup>K]:  
0.23 - 0.3 - 0.3  
Surface [m<sup>2</sup>]:  
250 - 324 - 473

Wall:  
U-value [W/m<sup>2</sup>K]:  
0.25 - 0.3 - 0.35  
Surface [m<sup>2</sup>]:  
414 - 581 - 812

Window:  
U-value [W/m<sup>2</sup>K]:  
1.4 - 1.5 - 1.5  
Surface to ERA ratio:  
0.15 - 0.16 - 0.17

Floor:  
U-value [W/m<sup>2</sup>K]:  
0.3 - 0.4 - 0.46  
Surface [m<sup>2</sup>]:  
229 - 296 - 424

Photovoltaic:  
Occurrence: 0.3%  
Power [kW]:  
2.2 - 2.2 - 2.2

Primary energy source:  
Gas: 65%  
Fuel oil: 16%  
Heat pump: 9%  
District heating: 6%  
Wood: 4%



Figure S9: Archetype 9\_2011–2019

Single-Family House  
45.1%  
corresponding to 404,907 m<sup>2</sup> ERA

2011–2019  
4135 Samples  
8.9% of dataset

Multi-Family House  
54.9%  
corresponding to 2,675,423 m<sup>2</sup> ERA

General infos:

ERA [m<sup>2</sup>]: 172 - 206 - 250  
Envelope factor: 1.81 - 2.04 - 2.27  
Number of floors: 2 - 2 - 3  
Floors height [m]: 2.4 - 2.4 - 2.7

Construction type:

Heavy: 48%  
Medium: 42%  
Light: 10%

① Roof:  
U-value [W/m<sup>2</sup>K]:  
0.15 - 0.17 - 0.2  
Surface [m<sup>2</sup>]:  
85 - 100 - 128

② Wall:  
U-value [W/m<sup>2</sup>K]:  
0.15 - 0.17 - 0.19  
Surface [m<sup>2</sup>]:  
147 - 181 - 216

③ Window:  
U-value [W/m<sup>2</sup>K]:  
0.93 - 1.0 - 1.2  
Surface to ERA ratio:  
0.16 - 0.18 - 0.23

④ Floor:  
U-value [W/m<sup>2</sup>K]:  
0.17 - 0.21 - 0.27  
Surface [m<sup>2</sup>]:  
78 - 94 - 118

⑤ Photovoltaic:  
Occurrence: 16.6%  
Power [kW]:  
4.3 - 7.0 - 9.0

⑥ Primary energy source:  
Heat pump: 73%  
Gas: 13%  
Wood: 7%  
District heating: 5%  
Fuel oil: 1%  
Solar heating: 1%

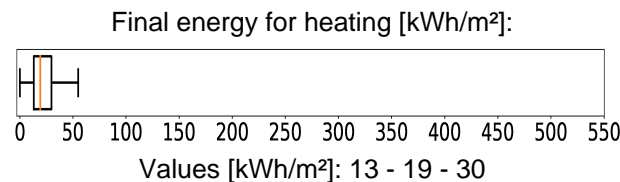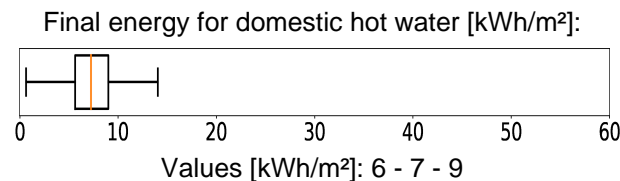

Global energy efficiency

Envelope efficiency



Envelope efficiency

Global energy efficiency

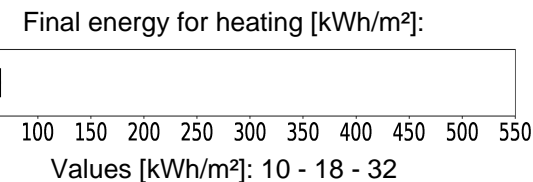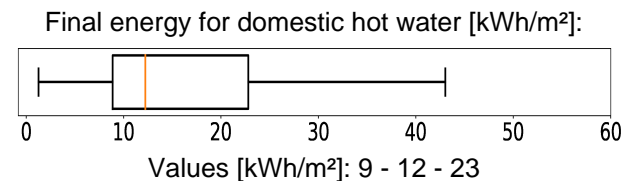

General infos:

ERA [m<sup>2</sup>]: 626 - 963 - 1456  
Envelope factor: 1.15 - 1.33 - 1.56  
Number of floors: 3 - 3 - 4  
Floors height [m]: 2.4 - 2.4 - 2.8

Construction type:

Heavy: 68%  
Medium: 30%  
Light: 2%

Roof:  
U-value [W/m<sup>2</sup>K]:  
0.14 - 0.17 - 0.2  
Surface [m<sup>2</sup>]:  
236 - 319 - 442

Wall:  
U-value [W/m<sup>2</sup>K]:  
0.15 - 0.17 - 0.2  
Surface [m<sup>2</sup>]:  
390 - 523 - 738

Window:  
U-value [W/m<sup>2</sup>K]:  
0.9 - 1.0 - 1.3  
Surface to ERA ratio:  
0.16 - 0.18 - 0.22

Floor:  
U-value [W/m<sup>2</sup>K]:  
0.18 - 0.23 - 0.31  
Surface [m<sup>2</sup>]:  
217 - 292 - 411

Photovoltaic:  
Occurrence: 16.2%  
Power [kW]:  
7.7 - 15.0 - 26.6

Primary energy source:  
Heat pump: 47%  
Gas: 27%  
District heating: 14%  
Wood: 10%  
Fuel oil: 1%  
Solar heating: 1%
